CORRECTION

# Correction: Which New Health Technologies Do We Need to Achieve an End to HIV/AIDS?

The *PLOS Biology* Staff

## Notice of Republication

This article was republished on May 19<sup>th</sup>, 2016 to correct poor figure quality in the PDF version, which was introduced during the typesetting process. The publisher apologizes for these issues with the figure quality. Please download this article again to view the updated version.

## Reference

1. Gray GE, Laher F, Doherty T, Abdool Karim S, Hammer S, Mascola J, et al. (2016) Which New Health Technologies Do We Need to Achieve an End to HIV/AIDS? PLoS Biol 14(3): e1002372. doi:[10.1371/journal.pbio.1002372](https://doi.org/10.1371/journal.pbio.1002372) PMID: [26933962](https://pubmed.ncbi.nlm.nih.gov/26933962/)

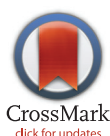

## OPEN ACCESS

**Citation:** The *PLOS Biology* Staff (2016) Correction: Which New Health Technologies Do We Need to Achieve an End to HIV/AIDS? PLoS Biol 14(6): e1002487. doi:[10.1371/journal.pbio.1002487](https://doi.org/10.1371/journal.pbio.1002487)

**Published:** June 7, 2016

**Copyright:** © 2016 The PLOS Biology Staff. This is an open access article distributed under the terms of the [Creative Commons Attribution License](https://creativecommons.org/licenses/by/4.0/), which permits unrestricted use, distribution, and reproduction in any medium, provided the original author and source are credited.
